# Supplementary material for: A mixed-methods pilot study of handheld fan for breathlessness in interstitial lung disease
Source: PubMed Central journal article supplement (PMC7994303; doi:10.1038/s41598-021-86326-8), 2021-03-25
Supplement: 41598_2021_86326_MOESM1_ESM.pdf [file 41598_2021_86326_MOESM1_ESM.pdf]

## **Online Supplementary:**

### **Manuscript Title:**

A mixed-methods pilot study of handheld fan for breathlessness in interstitial lung disease

### **Authors:**

Yet H Khor, Kirushallini Saravanan, Anne E Holland, Joanna YT Lee, Christopher J Ryerson, Christine F McDonald, Nicole SL Goh

**Table of content:**

- Supplementary file 1: Standardised instructions for intervention ..... 3
- Supplementary file 2: Interview topic guide ..... 4
- Supplementary file 3: Table E1 - Baseline participant characteristics of enrolled and non-enrolled patients ..... 5

## **Participant Information – Handheld Fan**

### **How should I use the handheld fan?**

- Hold the fan approximately 15cm from your face.
- Aim the draft of air towards the central part of your face so that you can feel it around the sides of your nose and above your top lip.

### **When can I use it?**

- You can use the fan as often as you like
- You may find it useful to use your fan:
  - during activities
  - when you need a break after activities
  - when you feel breathless at rest
- You can use your fan with other interventions, such as relaxation, breathing exercises and oxygen therapy.

**Keep your fan in your pocket or bag when you go out**  
**Keep your fan next to you when you are at home**

## **Interview Topic Guide**

### All participants

1. How does your chest condition affect you at the moment? (probe: daily life? particular problems? exercise tolerance?)
2. How do you manage your symptoms? (probe: any treatment, such as drugs, oxygen)
3. If the participant is using other interventions for managing symptoms: How do you find the treatment? (probe: why is that?)
4. What do you think about this trial? (probe: why is that?)
5. What were your thoughts when you heard about using a handheld fan for managing symptoms? (probe: why is that?)

### For participants using a handheld fan

6. How often did you use the handheld fan? (probe: daily, a few times a week, occasionally, not at all?)
7. Tell me about how you use the handheld fan. (probe: when? During activities, during recovery, at rest)
8. If the participant is using other interventions for managing symptoms: How do you compare using the handheld fan with your other treatments? (probe: why is that?)
9. What will stop you from using a handheld fan?
10. Do you want to keep using a handheld fan? (probe: why is that?)

### For participants not using a handheld fan

11. Do you want to start using a handheld fan? (probe: why is that?)

### Conclusion

12. Do you have anything else about this trial that you would like to share?

Table E1: Baseline participant characteristics of enrolled and non-enrolled patients

|                                     | <b>Enrolled<br/>Group<br/>(N = 34)</b> | <b>Non-Enrolled<br/>Group<br/>(N = 49)</b> | <b>p-value</b> |
|-------------------------------------|----------------------------------------|--------------------------------------------|----------------|
| <b>Age, years</b>                   | 73.3 ± 8.6                             | 71.2 ± 14.7                                | 0.47           |
| <b>Gender, Female:Male</b>          | 16:18                                  | 25:24                                      | 0.82           |
| <b>BMI, kg/m<sup>2</sup></b>        | 28.8 ± 5.0                             | 29.4 ± 5.2                                 | 0.78           |
| <b>Ever smoker, n (%)</b>           | 20 (59)                                | 24 (49)                                    | 0.50           |
| <b>Duration of diagnosis, years</b> | 3 (2, 6)                               | 3 (1.5, 6)                                 | 0.69           |
| <b>Diagnosis, n (%)</b>             |                                        |                                            | 1.00           |
| • <b>IPF</b>                        | 11 (32)                                | 16 (33)                                    |                |
| • <b>Non-IPF</b>                    | 23 (68)                                | 33 (67)                                    |                |
| <b>FEV1/FVC</b>                     | 78.8 ± 6.8                             | 79.4 ± 6.4                                 | 0.56           |
| <b>FVC (% pred)</b>                 | 70.7 ± 17.5                            | 74.8 ± 17.8                                | 0.62           |
| <b>DLCO (% pred)</b>                | 42.1 ± 11.5                            | 46.9 ± 17.3                                | 0.19           |

Data are expressed as mean ± standard deviation or median (interquartile range), except where indicated.

Abbreviations: BMI, body mass index; DLCO, diffusing capacity for carbon monoxide; FER, forced expiratory ratio; FEV1, forced expiratory volume in one second; FVC, forced vital capacity; IPF, idiopathic pulmonary fibrosis
